# Supplementary material for: Diffuse fibrosis, coronary microvascular dysfunction and systolic dysfunction in Wilson disease
Source: bioRxiv or medRxiv preprint supplement (doi:10.1101/2024.10.11.24315326), 2024-10-15
Supplement: Supplementary file [file media-1.pdf]

## Appendix

**Table 1. Intra- and inter-observer agreement**

|                         | <b>Intra-observer agreement</b> | <b>Inter-observer agreement</b> |
|-------------------------|---------------------------------|---------------------------------|
| <b>Native T1</b>        | 0.99, $p<0.001$                 | 0.99, $p<0.001$                 |
| <b>Native T2</b>        | 0.98, $p<0.001$                 | 0.98, $p<0.001$                 |
| <b>ECV</b>              | 1.00, $p<0.001$                 | 0.91, $p<0.001$                 |
| <b>Perfusion rest</b>   | 1.00, $p<0.001$                 | 1.00, $p<0.001$                 |
| <b>Perfusion stress</b> | 1.00, $p<0.001$                 | 0.99, $p<0.001$                 |
| <b>MPR</b>              | 0.99, $p<0.001$                 | 0.99, $p<0.001$                 |
| <b>LVEF</b>             | 0.89, $p=0.002$                 | 0.85, $p<0.001$                 |
| <b>LV GLS</b>           | 0.95, $p<0.001$                 | 0.94, $p<0.001$                 |
| <b>LV GCS</b>           | 0.84, $p=0.008$                 | 0.92, $p<0.001$                 |
| <b>LV GRS</b>           | 0.92, $p<0.001$                 | 0.82, $p<0.001$                 |

Intra- and inter-observer agreement presented as intraclass correlation coefficient (ICC) together with p-values. Abbreviations: ECV = extracellular volume; MPR = myocardial perfusion reserve; LVEF = left ventricular ejection fraction; LV GLS = left ventricular global longitudinal strain; LV GCS = left ventricular global circumferential strain; LV GRS = left ventricular global radial strain.

**Table 2. RV volumes and function**

| <b>CMR findings</b>              | <b>WD patients (n=17)</b> | <b>Volunteers (n=17)</b> | <b><i>p</i></b> |
|----------------------------------|---------------------------|--------------------------|-----------------|
| <b>RVEDV (ml)</b>                | 170±41                    | 165±35                   | 0.68            |
| <b>RVEDVi(ml/m<sup>2</sup>)</b>  | 88±19                     | 89±15                    | 0.93            |
| <b>RVESV (ml)</b>                | 64±21                     | 58±21                    | 0.43            |
| <b>RVESVi (ml/m<sup>2</sup>)</b> | 33±11                     | 31±11                    | 0.63            |
| <b>RVSV (ml)</b>                 | 107±29                    | 107±26                   | 0.97            |
| <b>RVSVi (ml/m<sup>2</sup>)</b>  | 55±12                     | 57±10                    | 0.55            |
| <b>RVEF (%)</b>                  | 63±9                      | 65±9                     | 0.40            |
| <b>RV GLS (%)</b>                | -18±4                     | -20±3                    | 0.16            |
| <b>RV AVPD (mm)</b>              | -19±4                     | -20±3                    | 0.63†           |

CMR findings are presented as mean ± standard deviation. P-values denotes the independent t-test, p-values marked † denotes the Mann Whitney U test. Abbreviations: CMR = cardiovascular magnetic resonance imaging; RV = right ventricle; RVEDV = right ventricular end-diastolic volume; RVESV = right ventricular end-systolic volume; RVSV = right ventricular stroke volume; RVEF = right ventricular ejection fraction; RV GLS = right ventricular global longitudinal strain; RV AVPD = right ventricle atrioventricular plane displacement; WD = Wilson disease.
